# Supplementary material for: Genetic Structure across Isolated Virginia Populations of the Endangered Candy Darter (Etheostoma osburni)
Source: MDPI journal article supplement (doi:10.3390/fishes8100490), 2023-10-01
Supplement: s1 [file s1]

# Genetic structure across isolated Virginia populations of the endangered candy darter (*Etheostoma osburni*)

Kathryn E. McBaine<sup>1,2</sup>, Paul L. Angermeier<sup>3,1</sup>, Eric M. Hallerman<sup>1\*</sup>

<sup>1</sup> Department of Fish and Wildlife Conservation, Virginia Polytechnic Institute and State University, Blacksburg, VA 24061-0321, USA; [katimc9@vt.edu](mailto:katimc9@vt.edu), [ehallerm@vt.edu](mailto:ehallerm@vt.edu)

<sup>2</sup> Current Affiliation: Idaho Department of Fish and Game, 1414 E. Locust Lane, Nampa, ID 83686, USA

<sup>3</sup> U.S. Geological Survey, Virginia Cooperative Fish and Wildlife Research Unit; Department of Fish and Wildlife Conservation, Virginia Polytechnic Institute and State University, Blacksburg, VA 24061-0321, [biota@vt.edu](mailto:biota@vt.edu)

\* Correspondence: [ehallerm@vt.edu](mailto:ehallerm@vt.edu); Tel.: +001-540-553-5873

Any use of trade, firm, or product names is for descriptive purposes only and does not imply endorsement by the U.S. Government.

**Table S1.** Site locations for Cripple Creek, Dismal Creek, Stony Creek, and Laurel Creek for all surveys. Coordinates are in decimal degrees.

| <b>Stream</b> | <b>Location within stream</b> | <b>Years sampled</b> | <b>Latitude</b> | <b>Longitude</b> |
|---------------|-------------------------------|----------------------|-----------------|------------------|
| Cripple       | Lower                         | 2016 & 2017          | 36.9            | -80.9            |
|               | Center                        | 2016 & 2017          | 36.9            | -81.0            |
|               | Upper                         | 2016 & 2017          | 36.9            | -81.0            |
| Dismal Creek  | Below Dismal Falls            | 2017                 | 37.2            | -80.9            |
|               | Above Dismal Falls 1          | 2017                 | 37.2            | -80.9            |
|               | Above Dismal Falls 2          | 2017                 | 37.2            | -80.9            |
| Stony Creek   | Lower 1                       | 2016, 2017, 2018     | 37.4            | -80.7            |
|               | Lower 2                       | 2017 & 2018          | 37.4            | -80.7            |
|               | Center 1                      | 2017 & 2018          | 37.4            | -80.6            |
|               | Center 2                      | 2016, 2017, 2018     | 37.4            | -80.6            |
|               | Upper                         | 2017 & 2018          | 37.4            | -80.6            |
| Laurel Creek  | Lower 1                       | 2017 & 2018          | 37.2            | -81.1            |
|               | Lower 2                       | 2017 & 2018          | 37.3            | -81.1            |
|               | Center                        | 2016, 2017, 2018     | 37.3            | -81.1            |
|               | Upper 1                       | 2017 & 2018          | 37.3            | -81.1            |
|               | Upper 2                       | 2017 & 2018          | 37.3            | -81.1            |

**Table S2.** Locus-by-locus genetic diversity metrics for four Virginia populations of candy darter, *Etheostoma osburni*, across 12 microsatellite loci.  $N$  = number of fish sampled,  $A$  = mean number of alleles per locus,  $A_r$  = allelic richness,  $H_o$  = mean observed heterozygosity,  $H_e$  = mean expected heterozygosity, Allelic Range = mean difference between sizes of largest and smallest alleles at a particular locus,  $M$  = ratio of number of alleles observed at a locus to number of alleles possible between the largest and smallest alleles (Garza and Williamson 2001).

| Stream        | Locus       | $N$ | $A$ | $A_r$ | $H_o$ | $H_e$ | Allelic Range | $M$  |
|---------------|-------------|-----|-----|-------|-------|-------|---------------|------|
| Cripple Creek | <i>D116</i> | 98  | 11  | 7.61  | 0.82  | 0.81  | 284.00        | 0.04 |
|               | <i>C124</i> | 98  | 9   | 8.09  | 0.69  | 0.84  | 80.00         | 0.11 |
|               | <i>C6</i>   | 98  | 3   | 3.00  | 0.59  | 0.64  | 8.00          | 0.33 |
|               | <i>D107</i> | 98  | 11  | 7.51  | 0.67  | 0.76  | 268.00        | 0.04 |
|               | <i>C208</i> | 98  | 3   | 2.97  | 0.43  | 0.45  | 16.00         | 0.18 |
|               | <i>C112</i> | 98  | 6   | 5.23  | 0.76  | 0.77  | 36.00         | 0.16 |
|               | <i>C207</i> | 98  | 5   | 4.31  | 0.63  | 0.63  | 16.00         | 0.29 |
|               | <i>C117</i> | 98  | 6   | 4.69  | 0.61  | 0.65  | 264.00        | 0.02 |
|               | <i>C3</i>   | 98  | 3   | 2.00  | 0.29  | 0.45  | 212.00        | 0.01 |
|               | <i>D10</i>  | 98  | 9   | 6.99  | 0.78  | 0.83  | 282.00        | 0.03 |
|               | <i>D108</i> | 98  | 7   | 5.69  | 0.78  | 0.80  | 232.00        | 0.03 |
|               | <i>D11</i>  | 98  | 7   | 5.21  | 0.63  | 0.77  | 234.00        | 0.03 |
| Dismal Creek  | <i>D116</i> | 50  | 5   | 4.00  | 0.52  | 0.67  | 292.00        | 0.02 |
|               | <i>C124</i> | 50  | 10  | 8.66  | 0.60  | 0.82  | 348.00        | 0.03 |
|               | <i>C6</i>   | 50  | 2   | 1.00  | 0.00  | 0.22  | 248.00        | 0.01 |
|               | <i>D107</i> | 50  | 5   | 3.90  | 0.44  | 0.73  | 272.00        | 0.02 |
|               | <i>C208</i> | 50  | 2   | 1.00  | 0.00  | 0.08  | 234.00        | 0.01 |
|               | <i>C112</i> | 50  | 2   | 1.00  | 0.00  | 0.08  | 178.00        | 0.01 |
|               | <i>C207</i> | 50  | 3   | 2.00  | 0.20  | 0.25  | 216.00        | 0.01 |
|               | <i>C117</i> | 50  | 2   | 1.00  | 0.00  | 0.08  | 260.00        | 0.01 |
|               | <i>C3</i>   | 50  | 4   | 2.85  | 0.36  | 0.67  | 216.00        | 0.02 |
|               | <i>D10</i>  | 50  | 4   | 3.00  | 0.24  | 0.66  | 262.00        | 0.02 |
|               | <i>D108</i> | 50  | 5   | 3.77  | 0.48  | 0.71  | 204.00        | 0.02 |
|               | <i>D11</i>  | 50  | 3   | 2.00  | 0.20  | 0.56  | 238.00        | 0.01 |
| Laurel Creek  | <i>D116</i> | 94  | 14  | 9.55  | 0.79  | 0.86  | 332.00        | 0.04 |
|               | <i>C124</i> | 94  | 10  | 7.33  | 0.49  | 0.79  | 320.00        | 0.03 |
|               | <i>C6</i>   | 94  | 5   | 3.95  | 0.62  | 0.69  | 260.00        | 0.02 |
|               | <i>D107</i> | 94  | 11  | 7.89  | 0.60  | 0.79  | 300.00        | 0.04 |
|               | <i>C208</i> | 94  | 2   | 1.60  | 0.04  | 0.04  | 12.00         | 0.15 |
|               | <i>C112</i> | 94  | 6   | 5.09  | 0.70  | 0.66  | 28.00         | 0.21 |

|             |             |    |    |      |      |      |        |      |
|-------------|-------------|----|----|------|------|------|--------|------|
|             | <i>C207</i> | 94 | 3  | 2.97 | 0.43 | 0.36 | 16.00  | 0.18 |
|             | <i>C117</i> | 94 | 4  | 3.99 | 0.60 | 0.61 | 28.00  | 0.14 |
|             | <i>C3</i>   | 94 | 3  | 2.00 | 0.38 | 0.40 | 212.00 | 0.01 |
|             | <i>D10</i>  | 94 | 7  | 5.61 | 0.57 | 0.77 | 274.00 | 0.03 |
|             | <i>D108</i> | 94 | 9  | 7.29 | 0.68 | 0.73 | 236.00 | 0.04 |
|             | <i>D11</i>  | 94 | 10 | 7.77 | 0.79 | 0.84 | 246.00 | 0.04 |
| Stony Creek | <i>D116</i> | 94 | 14 | 6.35 | 0.79 | 0.86 | 332.00 | 0.04 |
|             | <i>C124</i> | 94 | 10 | 9.78 | 0.49 | 0.79 | 320.00 | 0.03 |
|             | <i>C6</i>   | 94 | 5  | 2.00 | 0.62 | 0.69 | 260.00 | 0.02 |
|             | <i>D107</i> | 94 | 11 | 8.80 | 0.60 | 0.79 | 300.00 | 0.04 |
|             | <i>C208</i> | 94 | 2  | 2.99 | 0.04 | 0.04 | 12.00  | 0.15 |
|             | <i>C112</i> | 94 | 6  | 4.35 | 0.70 | 0.66 | 28.00  | 0.21 |
|             | <i>C207</i> | 94 | 3  | 3.34 | 0.43 | 0.36 | 16.00  | 0.18 |
|             | <i>C117</i> | 94 | 4  | 2.00 | 0.60 | 0.61 | 28.00  | 0.14 |
|             | <i>C3</i>   | 94 | 3  | 2.00 | 0.38 | 0.40 | 212.00 | 0.01 |
|             | <i>D10</i>  | 94 | 7  | 4.75 | 0.57 | 0.77 | 274.00 | 0.03 |
|             | <i>D108</i> | 94 | 9  | 3.00 | 0.68 | 0.73 | 236.00 | 0.04 |
|             | <i>D11</i>  | 94 | 10 | 5.38 | 0.79 | 0.84 | 246.00 | 0.04 |

---

**Table S3.** Mean log probabilities,  $\text{Ln}P(D|K)$ , for each given number of multilocus genotypic clusters ( $K$ ) provided by STRUCTURE Bayesian cluster analysis. Reps = replicate runs and Stdev = standard deviation. N/A = no metric relevant for this value of  $K$ .

| $K$ | Reps | Mean $\text{Ln}P(K)$ | Stdev $\text{Ln}P(K)$ | $\text{Ln}'(K)$ | $ \text{Ln}''(K) $ | Delta $K$ |
|-----|------|----------------------|-----------------------|-----------------|--------------------|-----------|
| 1   | 10   | -6904                | 0.434102              | N/A             | N/A                | N/A       |
| 2   | 10   | -6027.1              | 90.26245              | 876.9           | 220.68             | 2.44487   |
| 3   | 10   | -5370.9              | 39.2259               | 656.22          | 124.39             | 3.171119  |
| 4   | 10   | -4839                | 0.254078              | 531.83          | 511.17             | 2011.8637 |
| 5   | 10   | -4818.4              | 11.69673              | 20.66           | 132.55             | 11.332229 |
| 6   | 10   | -4930.3              | 44.60997              | -111.89         | 25.08              | 0.562206  |
| 7   | 10   | -5017.1              | 22.72366              | -86.81          | 85.32              | 3.754677  |
| 8   | 10   | -5018.6              | 47.16937              | -1.49           | N/A                | N/A       |

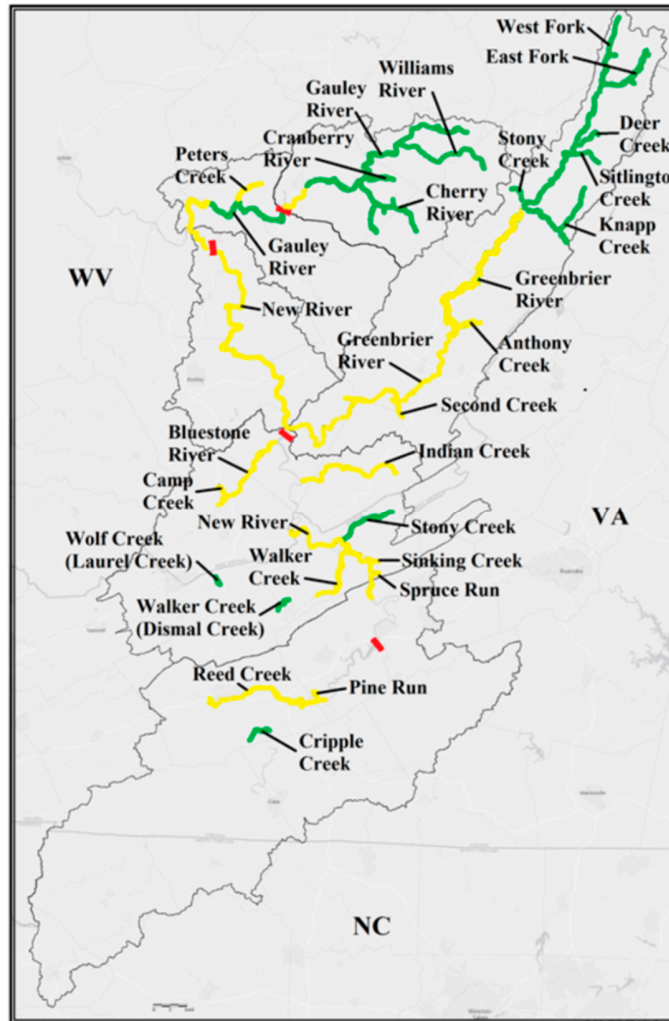

**Figure S1.** Current and historical distribution of the candy darter, *Etheostoma osburni* (USFWS 2018). Green indicates extant candy darter populations; yellow indicates historical or extirpated populations. Red lines are major dams that present barriers to fish movement.



a.

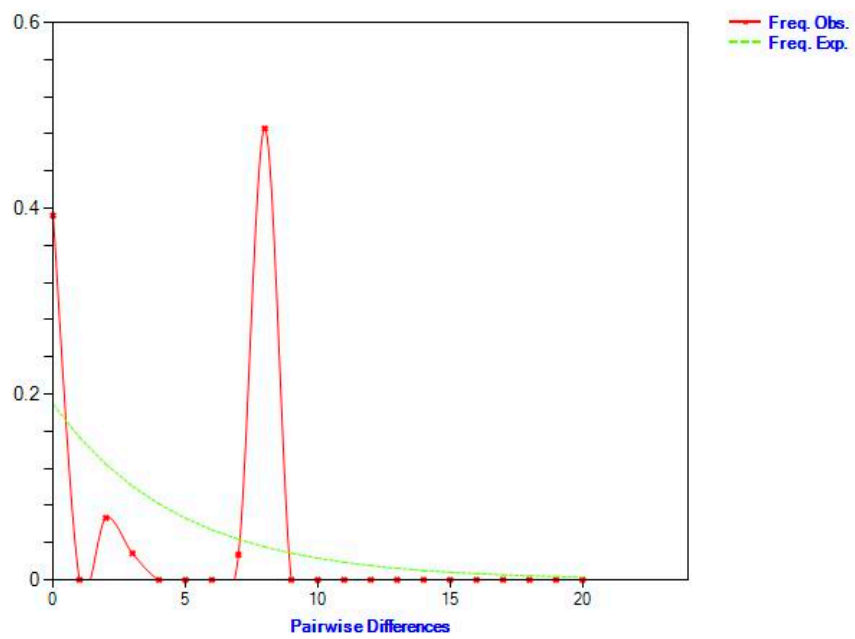

b.

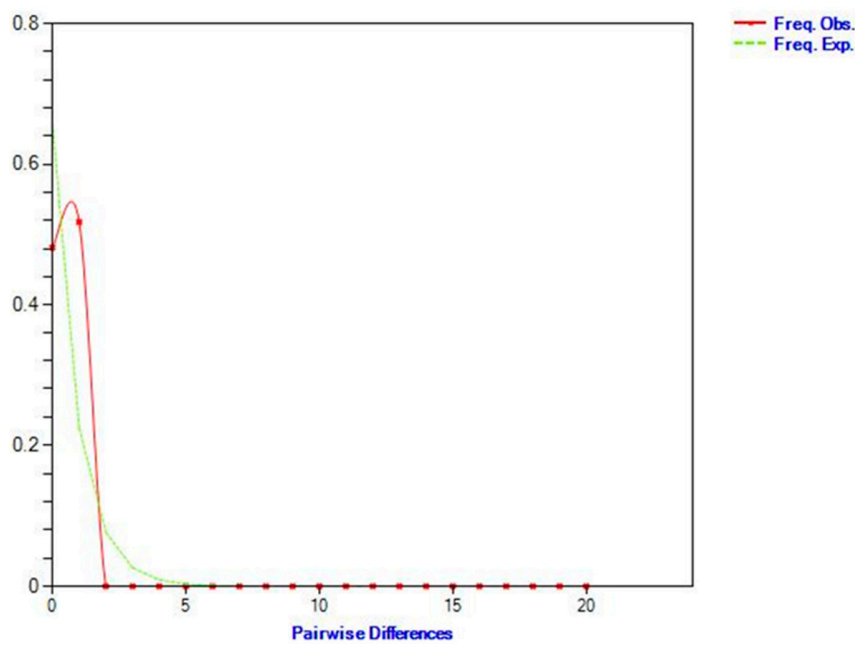



c.

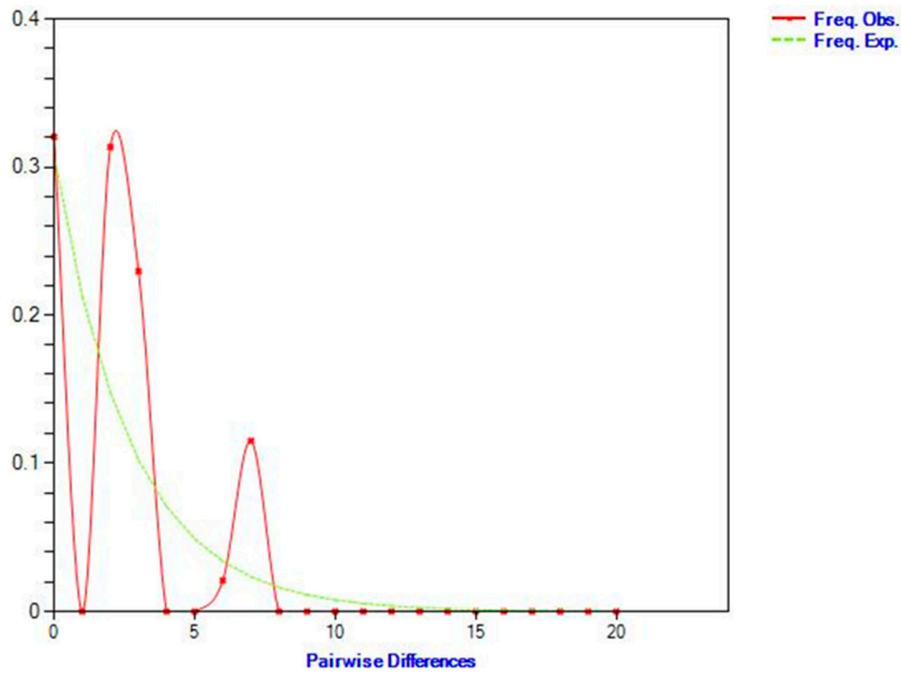

d.

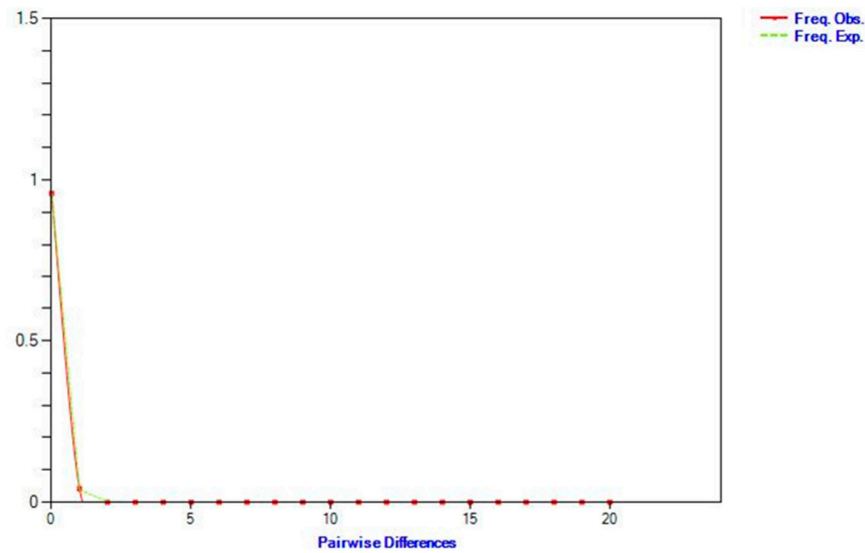

**Figure S3.** DNA sequence mismatch distributions of pairwise nucleotide differences in the a) Cripple Creek, b) Dismal Creek, c) Laurel Creek, and d) Stony Creek populations of candy darter, *Etheostoma osburni*. Freq. Obs. = Frequency observed; Freq. Exp. = Frequency expected.

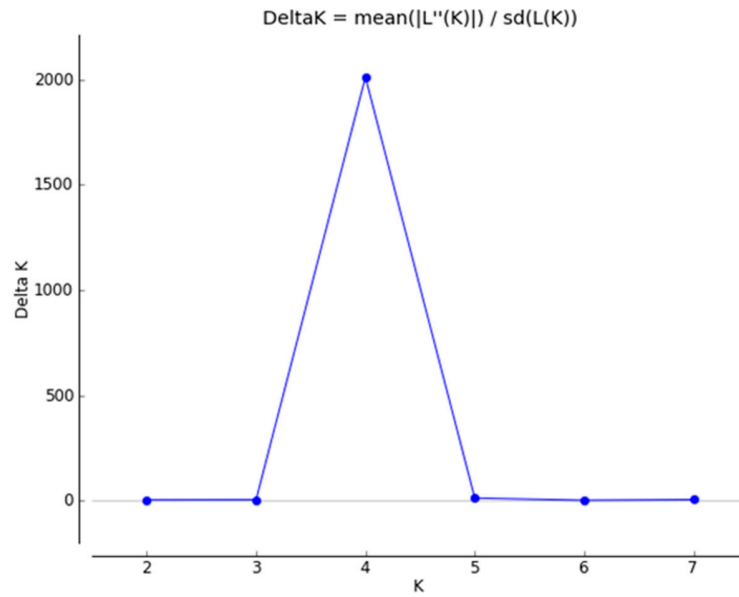

**Figure S4.** Results from application of the Evanno et al. (2005) method for determining the best-supported number of genetic clusters ( $K$ ) using 12 loci in STRUCTURE. Clusters represent similar multi-locus genotypes of individual Candy Darters, *Etheostoma osburni*, regardless of point of collection. DeltaK = change in log probabilities of each  $K$ ,  $\text{mean}(|L''(K)|)$  = mean log likelihood among replicates for each value of  $K$ ,  $\text{sd}(L(K))$  = standard deviation of log likelihoods among replicates for the same  $K$ .
